# Supplementary material
Source: Springer Nature journal article supplement (https://www.springermedizin.de/resource/supplementary/12872_2014_859_MOESM5_ESM.pdf/9430694)

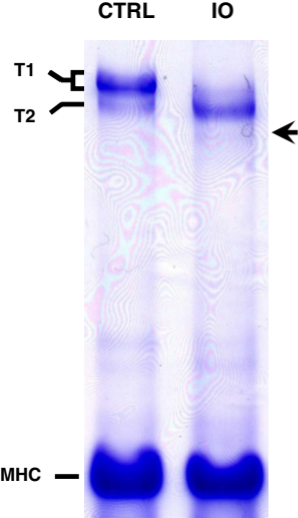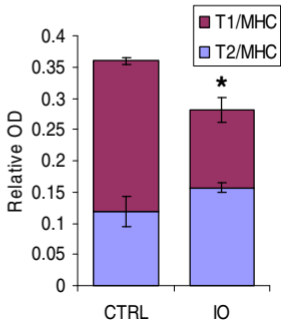

Supplement: MOESM5 [file 9430694]
